# Supplementary material for: Long non-coding RNA CCAT1 as a diagnostic and prognostic molecular marker in various cancers: a meta-analysis
Source: PubMed Central journal article supplement (PMC5955114; doi:10.18632/oncotarget.24923), 2018-05-04
Supplement: oncotarget-09-23695-s001.pdf [file oncotarget-09-23695-s001.pdf]

# Long non-coding RNA CCAT1 as a diagnostic and prognostic molecular marker in various cancers: a meta-analysis

## SUPPLEMENTARY MATERIALS

**Supplementary Table 1: Characteristics of included studies**

| Study (First author) | Year | Country | Cancer type | Total number | Detection method | Cut-off | CCAT1 expression |              |                 |      |            |            |      |               | Survival analysis | Multivariate analysis | HR statistic | Hazard ratios (95%CI) | Follow-up months |                     |             |
|----------------------|------|---------|-------------|--------------|------------------|---------|------------------|--------------|-----------------|------|------------|------------|------|---------------|-------------------|-----------------------|--------------|-----------------------|------------------|---------------------|-------------|
|                      |      |         |             |              |                  |         | LNM              |              |                 |      | TNM        |            |      |               |                   |                       |              |                       |                  |                     |             |
|                      |      |         |             |              |                  |         | Low              | Low with LNM | Low without LNM | High | Low in LTS | Low in HTS | High | High with LNM |                   |                       |              |                       |                  | High without LNM    | High in LTS |
| Jiang XM [12]        | 2017 | China   | CCA         | 91           | qRT-PCR          | Median  | 44               | 19           | 25              | 25   | 19         | 47         | 33   | 14            | 13                | 34                    | OS           | Yes                   | Rep              | 2.250 (1.395–3.630) | 50 (Total)  |
| Zhang E [13]         | 2017 | China   | ESCC        | 90           | qRT-PCR          | Mean    | 45               | 19           | 26              | 23   | 22         | 45         | 29   | 16            | 17                | 28                    | OS           | Yes                   | SC               | 2.88 (1.53–5.43)    | 60 (Total)  |
| Dou CQ [14]          | 2017 | China   | HCC         | 40           | qRT-PCR          | Median  | 15               | 7            | 8               | 9    | 6          | 25         | 16   | 9             | 6                 | 19                    | NA           | No                    | NA               | NA                  | NA          |
| Zhu HQ [15]          | 2015 | China   | HCC         | 86           | qRT-PCR          | Median  | 43               | NA           | NA              | NA   | NA         | 43         | NA   | NA            | NA                | NA                    | OS           | Yes                   | Rep              | 3.33 (1.60–6.96)    | 40 (Total)  |
| Deng L [16]          | 2015 | China   | HCC         | 66           | qRT-PCR          | Median  | 33               | NA           | NA              | NA   | NA         | 33         | NA   | NA            | NA                | NA                    | OS           | No                    | SC               | 1.36 (0.40–4.65)    | 30 (Total)  |
| Lv L [17]            | 2017 | China   | MEL         | 30           | qRT-PCR          | Median  | 15               | NA           | NA              | NA   | NA         | 15         | NA   | NA            | NA                | NA                    | OS           | No                    | SC               | 1.93 (0.86–4.30)    | 60 (Total)  |
| Zhou BG [18]         | 2016 | China   | GC          | 30           | qRT-PCR          | Median  | 15               | NA           | NA              | 11   | 4          | 15         | NA   | NA            | 4                 | 11                    | NA           | No                    | NA               | NA                  | NA          |
| Zhang XF [19]        | 2015 | China   | BRC         | 92           | qRT-PCR          | Mean    | 43               | 3            | 40              | 35   | 8          | 49         | 15   | 34            | 19                | 30                    | OS           | Yes                   | Rep              | 2.891 (1.483–6.215) | 60 (Total)  |
| He X [20]            | 2014 | China   | CC          | 48           | qRT-PCR          | Median  | 24               | 6            | 18              | 19   | 5          | 24         | 15   | 9             | 9                 | 15                    | OS           | No                    | SC               | 1.92 (0.81–4.55)    | 40 (Total)  |

CCA: cholangiocarcinoma, ESCC: esophageal squamouscell carcinoma, HCC: hepatocellular carcinoma, GC: gastric cancer, BRC: breast cancer, CC: colon cancer, qRT-PCR: quantitative real-time polymerase chain reaction, LNM: lymph node metastasis, TNM: tumor stage, LTS: low tumor stage(I, II), HTS: high tumor stage(III, IV), OS: overall survival, NA: not available, Rep: reported, SC: survival curve.
